# Supplementary material for: A pyrene-involved luminescent MOF for monitoring 1-hydroxypyrene, a biomarker for human intoxication of PAH carcinogens
Source: Royal Society of Chemistry journal article supplement (doi:10.1039/c8an00909k), 2018-01-01
Supplement: c8an00909k1.pdf [file c8an00909k1.pdf]

## SUPPORTING INFORMATION

### **A pyrene-involved luminescent MOF for monitoring 1-Hydroxypyrene, a biomarker for human intoxication of PAH carcinogens**

You Zhou,<sup>\*a</sup> Qian Yang,<sup>a</sup> Jing Cuan,<sup>b</sup> Yanan Wang,<sup>a</sup> Ning Gan,<sup>\*a</sup> Yuting Cao,<sup>a</sup> Tianhua Li<sup>a</sup>

<sup>a</sup> Faculty of Materials Science and Chemical Engineering, Ningbo University, Ningbo 315211, Zhejiang, China. E-mail: zhouyou@nbu.edu.cn, ganning@nbu.edu.cn.

<sup>b</sup> Institute for Superconducting & Electronic Materials, School of Mechanical, Materials and Mechatronics Engineering, University of Wollongong, Wollongong, NSW 2522, Australia.

\* Corresponding Author, E-mail: zhouyou@nbu.edu.cn, ganning@nbu.edu.cn

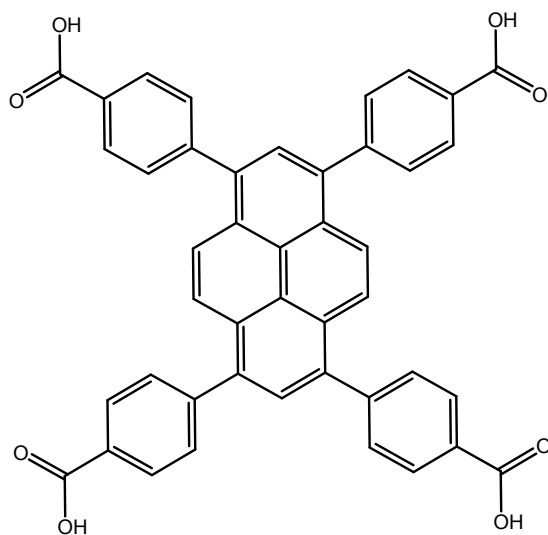

**Figure S1.** Molecular structure of 4,4',4'',4'''-(pyrene-1,3,6,8-tetrayl) tetrabenzoic acid.

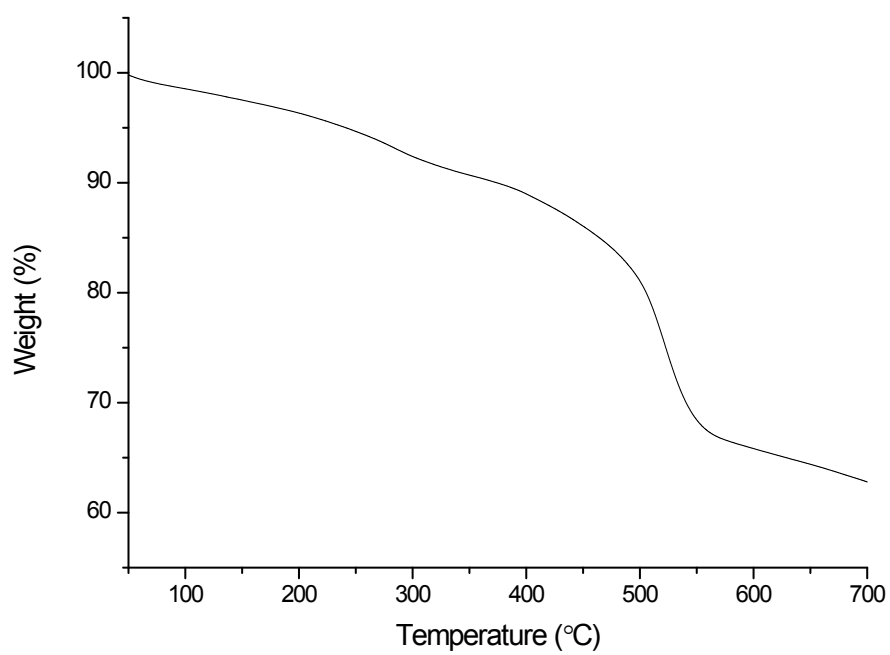

**Figure S2.** Thermogravimetric analysis of NU-1000.

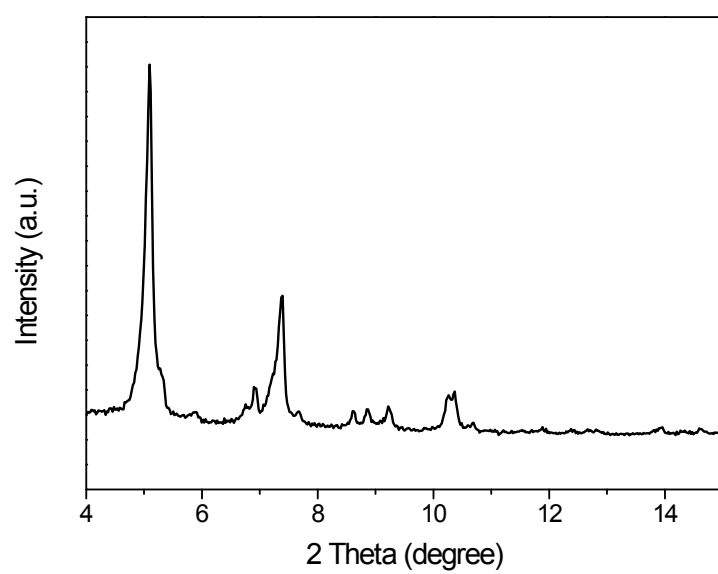

**Figure S3.** PXRD of NU-1000 after immersing in water for 4 days.

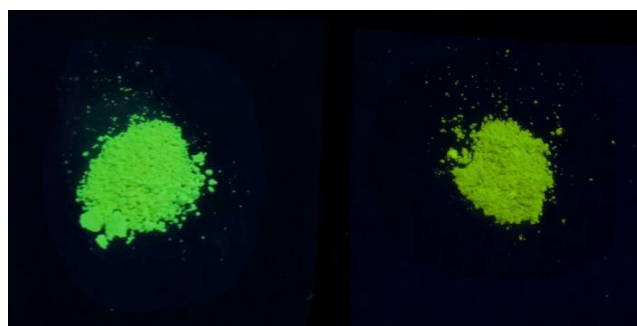

**Figure S4.** Photographs of NU-1000 (left) and TBAPy ligand (right) under irradiation of a 365 nm UV lamp.

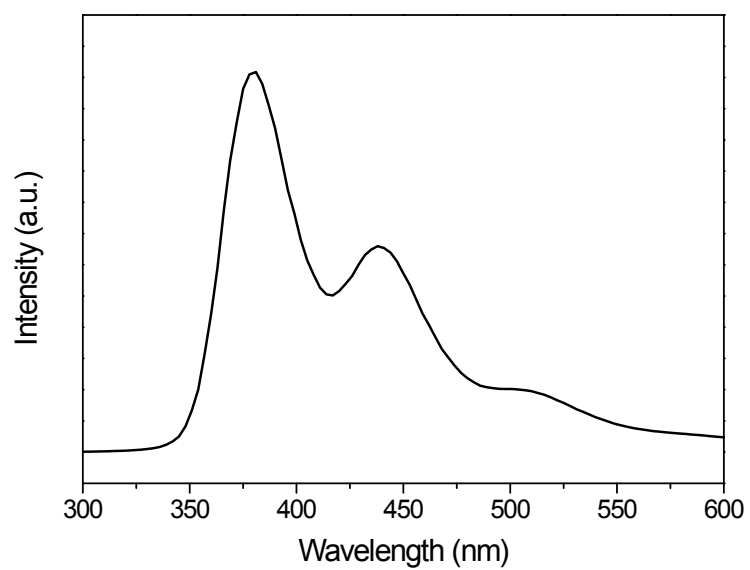

**Figure S5.** Emission spectrum of DMF solution of TBAPy ligand ( $1 \times 10^{-8}$  M).

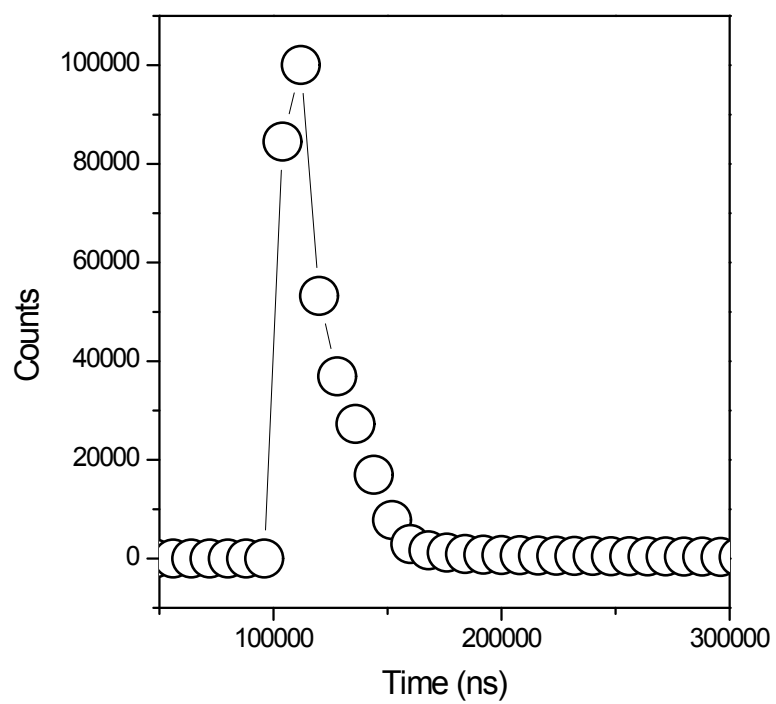

**Figure S6.** Luminescence decay curve of NU-1000.

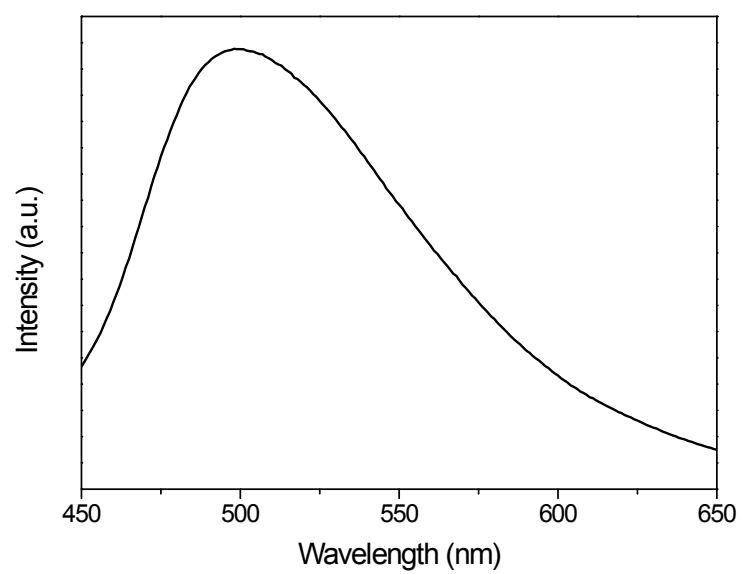

**Figure S7.** Emission spectrum of NU-1000 aqueous suspension.

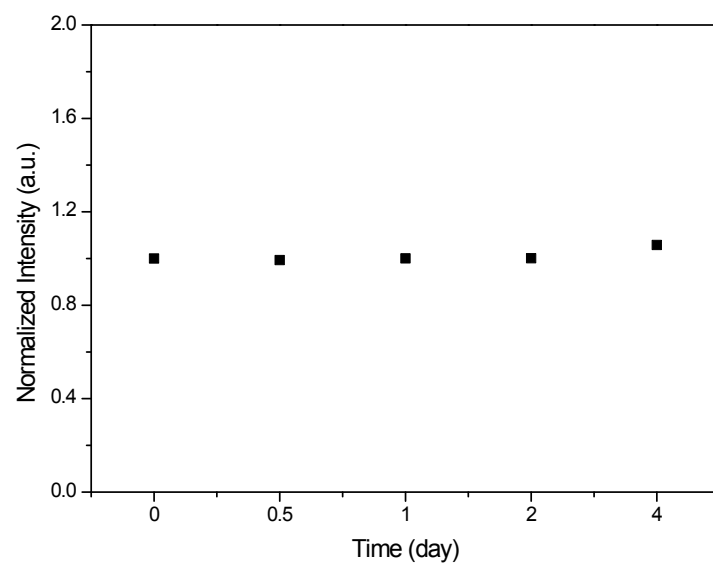

**Figure S8.** The time-dependent emission intensity of NU-1000 aqueous suspension.

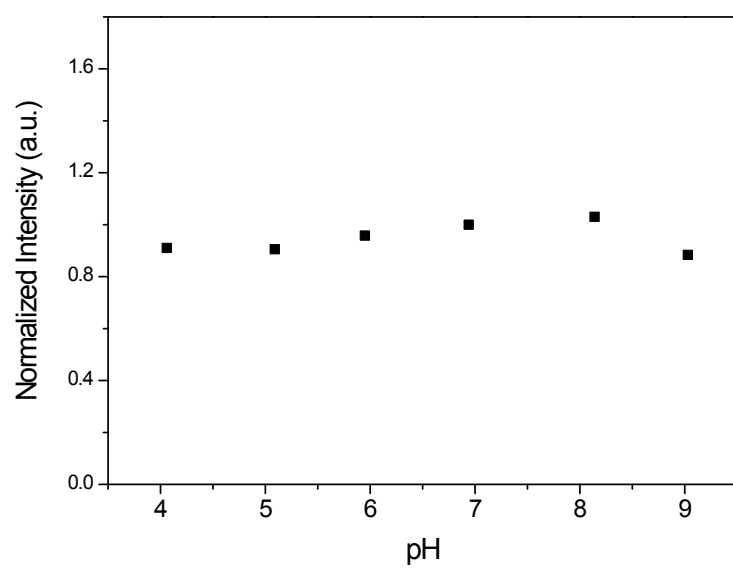

**Figure S9.** The emission intensity of NU-1000 aqueous suspension as a function of pH values.

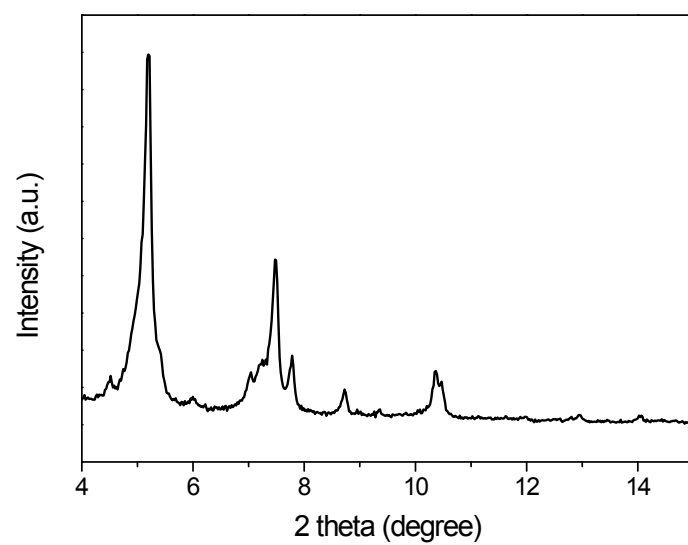

**Figure S10.** The PXRD pattern of NU-1000-1-HP.

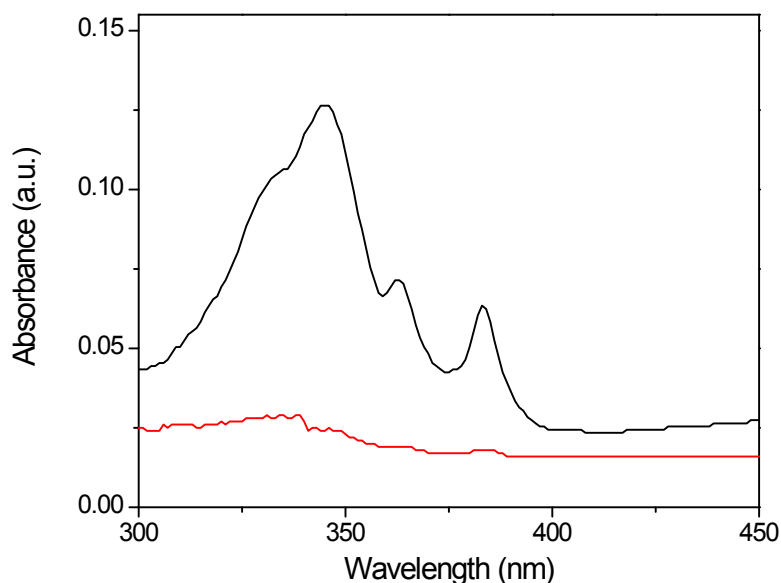

**Figure S11.** UV-vis absorption of pristine 1-HP solution (black) and that upon addition of activated NU-1000 (red). The concentration and volume of pristine 1-HP solution is 0.01 mM 500 mL, respectively; the mass of the added NU-1000 is 2.2 mg.

#### Calculation of the solubility partition coefficient of 1-HP in NU-1000/water system

The solubility partition coefficient of 1-HP in NU-1000/water system is the ratio of equilibrium 1-HP concentrations in the pores of NU-1000 and water ( $C_{\text{MOF}}/C_e$ ). The equilibrium concentration of TC in water can be determined from UV-vis data (Figure S11). The concentration of TC in the channels of NU-1000 can be calculated by the following equation:

$$C_{\text{MOF}} = (C_0 - C_e)V_{\text{water}}/mV_{\text{MOF}}$$

where  $C_0$  and  $C_e$  ( $\text{mg L}^{-1}$ ) are the initial and equilibrium concentrations of solution, respectively;  $V_{\text{water}}$  (L) is the volume of 1-HP aqueous suspension;  $m$  (g) is mass of NU-1000;  $V_{\text{MOF}}$  ( $\text{cm}^3 \text{g}^{-1}$ ) is the calculated total pore volume of NU-1000.  $V_{\text{MOF}}$  is  $1.4 \text{ cm}^3 \text{g}^{-1}$ , which is determined from  $\text{N}_2$  adsorption-desorption measurement at 77 K.

**Table S1.** Lattice parameters of NU-1000 product obtained by Rietveld refinement of PXRD data.

| Sample  | Space group | $a/\text{\AA}$ | $b/\text{\AA}$ | $c/\text{\AA}$ | $\alpha/^\circ$ | $\beta/^\circ$ | $\gamma/^\circ$ | Volume/ $\text{\AA}^3$ |
|---------|-------------|----------------|----------------|----------------|-----------------|----------------|-----------------|------------------------|
| NU-1000 | P6/mmm      | 38.0163        | 38.0163        | 16.0288        | 90              | 90             | 120             | 20061.82               |

**Table S2** Detection of 1-HP in human urine sample.

| Samples | Spiked (ug/L) | Founded (ug/L)   | Recovery (%) | RSD (n = 3) (%) |
|---------|---------------|------------------|--------------|-----------------|
| 1       | 5.0           | 4.63 $\pm$ 0.19  | 92.56        | 4.12            |
| 2       | 10.0          | 10.13 $\pm$ 0.12 | 101.3        | 1.23            |
| 3       | 15.0          | 14.60 $\pm$ 0.31 | 97.34        | 2.12            |
